# Supplementary material for: Deep sequencing reveals cell-type-specific patterns of single-cell transcriptome variation
Source: PubMed Central journal article supplement (PMC4480509; doi:10.1186/s13059-015-0683-4), 2015-06-09

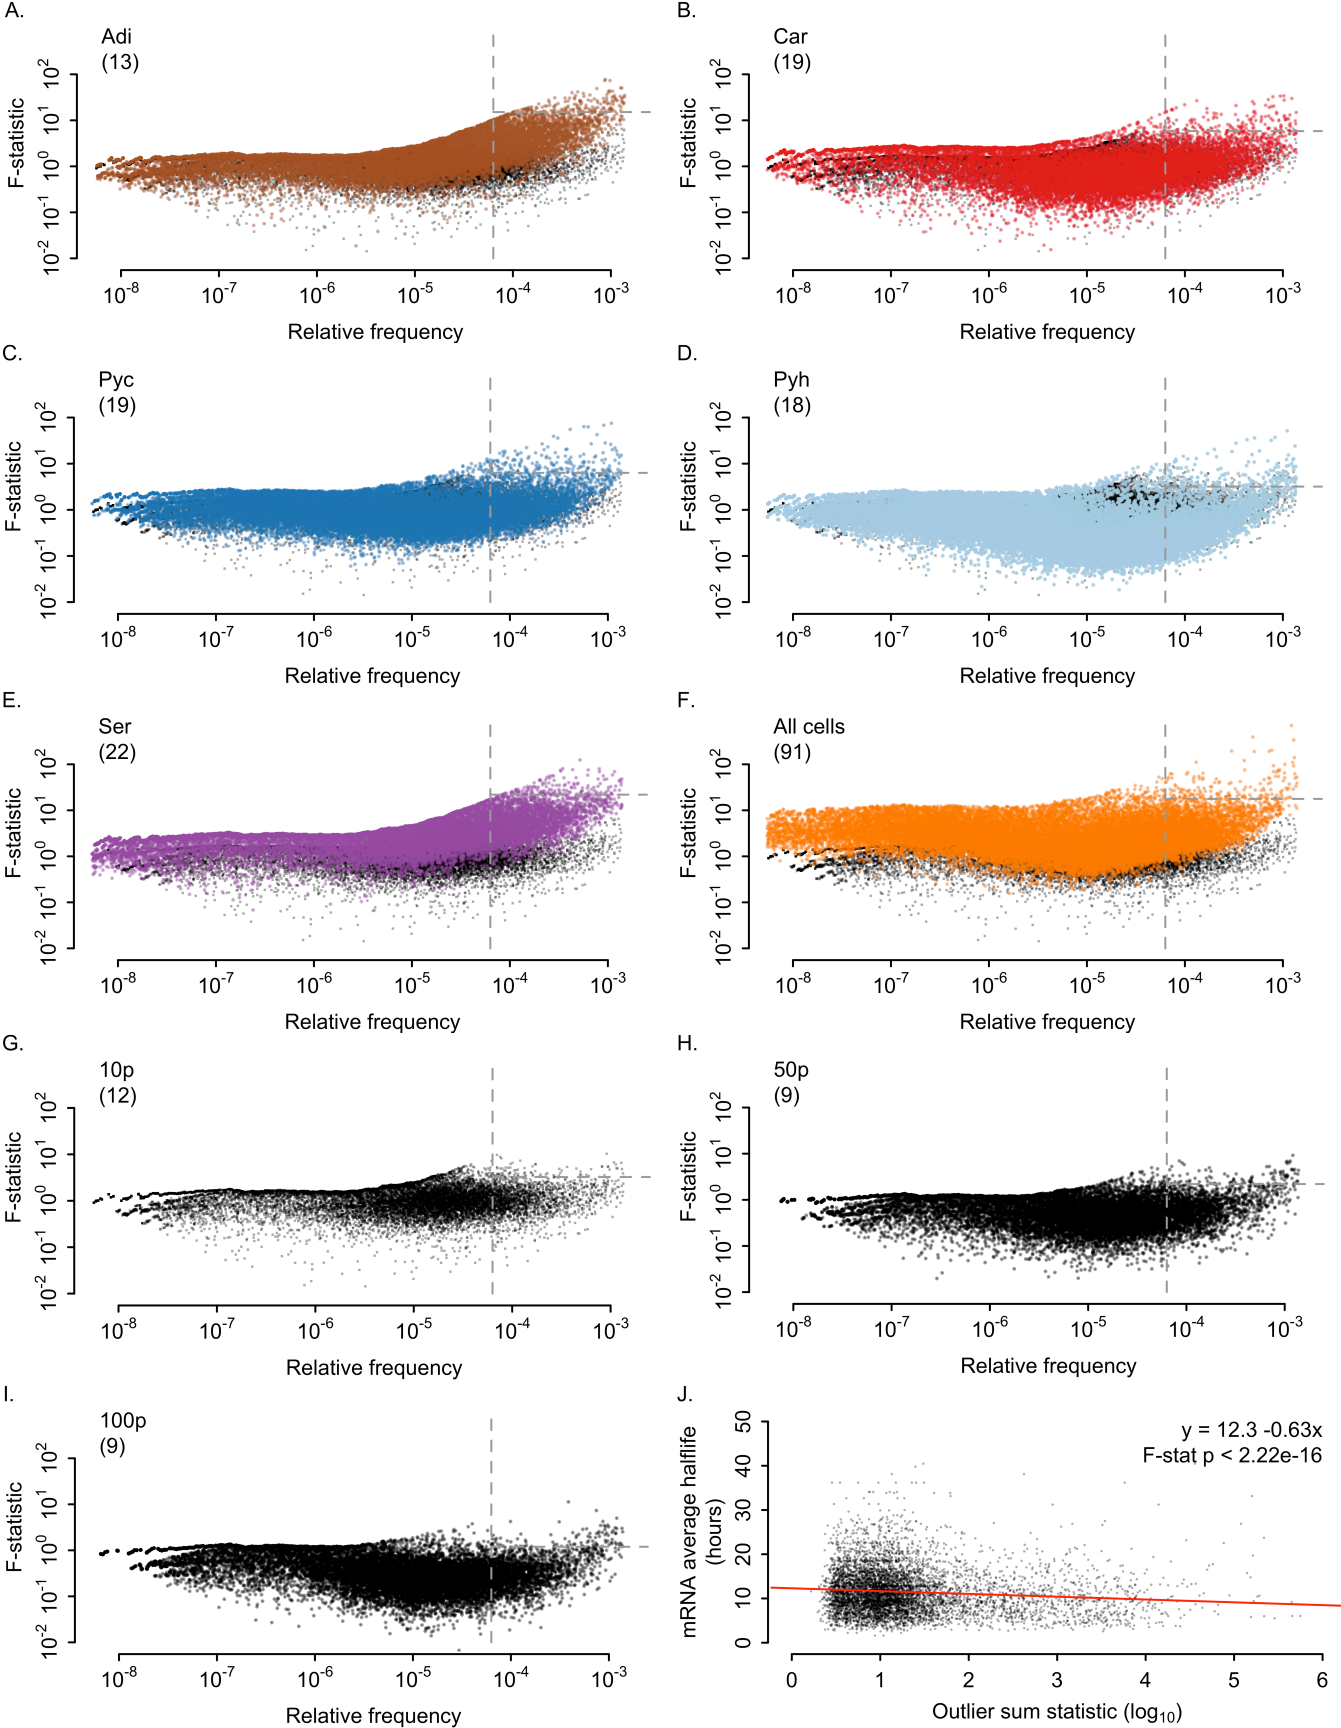

Supplement: 13059_2015_683_MOESM5_ESM.pdf [file 13059_2015_683_MOESM5_ESM.pdf]
